# Supplementary material for: A framework for cut-over management
Source: PeerJ journal article supplement (doi:10.7717/peerj-cs.29), 2015-11-04
Supplement: Data_for_PeerJ_Publication.xlsx [file Data_for_PeerJ_Publication.xlsx]

## Sheet: Figure_08
year	cw	week	incidents	marker rollout
2013	1	1	54
	2	2	72
	3	3	66
	4	4	64
	5	5	69
	6	6	57
	7	7	56	200
	8	8	124
	9	9	73
	10	10	57
	11	11	84
	12	12	109
	13	13	65
	14	14	77
	15	15	95
	16	16	86	200
	17	17	171
	18	18	119
	19	19	124
	20	20	127
	21	21	91
	22	22	95
	23	23	93
	24	24	85	200
	25	25	107
	26	26	124
	27	27	140
	28	28	68
	29	29	94
	30	30	78
	31	31	71
	32	32	58	200
	33	33	71
	34	34	58
	35	35	70
	36	36	47
	37	37	51
	38	38	50
	39	39	56	200
	40	40	69
	41	41	70
	42	42	74
	43	43	61
	44	44	43
	45	45	57
	46	46	58
	47	47	45
	48	48	73	200
	49	49	69
	50	50	58
	51	51	102
	52	52	36
2014	1	53	47
	2	54	75
	3	55	72
	4	56	63
	5	57	56
	6	58	30
	7	59	58
	8	60	46
	9	61	62
	10	62	32	200
	11	63	82
	12	64	55
	13	65	46
	14	66	57
	15	67	60
	16	68	52
	17	69	57
	18	70	47
	19	71	53	200
	20	72	90
	21	73	56
	22	74	49
	23	75	99
	24	76	51
	25	77	43
	26	78	45
	27	79	63	200
	28	80	86
	29	81	52
	30	82	69
	31	83	51
	32	84	57
	33	85	42
	34	86	39	200
	35	87	51
	36	88	64
	37	89	44
	38	90	33
	39	91	38
	40	92	41
	41	93	62	200
	42	94	81
	43	95	43
	44	96	54
	45	97	26
	46	98	78
	47	99	27
	48	100	42
	49	101	57	200
	50	102	102
	51	103	65
	52	104	24
2015	1	105	22
	2	106	45
	3	107	49
	4	108	34
	5	109	45
	6	110	47
	7	111	67
	8	112	56
	9	113	45
	10	114	56	200
	11	115	79
	12	116	59
	13	117	60
	14	118	55
	15	119	57
	16	120	40
	17	121	58
	18	122	40
	19	123	46
	20	124	58
	21	125	36

## Sheet: Figure_9,10
	Marseille	Altona	Bergedorf	Eimsbüttel	Hamburg-Mitte	Hamburg Harburg	Wandsbek	Cap San Diego	Halunder Jet	Rickmer Rickmers	Schaarhörn	Elbe 3	Eisbrecher Stettin
-4	64	65	91	94	47	57	58	52	51	51	33	78	67
-3	69	77	95	78	51	58	46	57	43	57	38	27	56
-2	57	95	93	71	50	45	62	47	45	42	41	42	45
-1	56	86	85	58	56	73	32	53	63	39	62	57	56
1	124	171	107	71	69	69	82	90	86	51	81	102	79
2	73	119	124	58	70	58	55	56	52	64	43	65	59
3	57	124	140	70	74	102	46	49	69	44	54	24	60
4	84	127	68	47	61	36	57	99	51	33	26	22	55
	61.5	80.75	91	75.25	51	58.25	49.5	52.25	50.5	47.25	43.5	51	56
	0.601626	0.795666	0.269231	-0.142857	0.362745	0.0901288	0.383838	0.397129	0.366337	0.216931	0.425287	0.637255	0.232143
	Marseille	Altona	Bergedorf	Eimsbüttel	Hamburg-Mitte	Hamburg Harburg	Wandsbek	Cap San Diego	Halunder Jet	Rickmer Rickmers	Schaarhörn	Elbe 3	Eisbrecher Stettin
-4	1.04065	0.804954	1	1.24917	0.921569	0.978541	1.17172	0.995215	1.0099	1.07937	0.758621	1.52941	1.19643
-3	1.12195	0.95356	1.04396	1.03654	1	0.995708	0.929293	1.09091	0.851485	1.20635	0.873563	0.529412	1
-2	0.926829	1.17647	1.02198	0.943522	0.980392	0.772532	1.25253	0.899522	0.891089	0.888889	0.942529	0.823529	0.803571
-1	0.910569	1.06502	0.934066	0.770764	1.09804	1.25322	0.646465	1.01435	1.24752	0.825397	1.42529	1.11765	1
1	2.01626	2.11765	1.17582	0.943522	1.35294	1.18455	1.65657	1.72249	1.70297	1.07937	1.86207	2	1.41071
2	1.18699	1.47368	1.36264	0.770764	1.37255	0.995708	1.11111	1.07177	1.0297	1.3545	0.988506	1.27451	1.05357
3	0.926829	1.5356	1.53846	0.930233	1.45098	1.75107	0.929293	0.937799	1.36634	0.931217	1.24138	0.470588	1.07143
4	1.36585	1.57276	0.747253	0.624585	1.19608	0.618026	1.15152	1.89474	1.0099	0.698413	0.597701	0.431373	0.982143
	Rollout	Increase
	Marseille	0.601626
	Altona	0.795666
	Bergedorf	0.269231
	Eimsbüttel	-0.142857
	Hamburg-Mitte	0.362745
	Hamburg Harburg	0.0901288
	Wandsbek	0.383838
	Cap San Diego	0.397129
	Halunder Jet	0.366337
	Rickmer Rickmers	0.216931
	Schaarhörn	0.425287
	Elbe 3	0.637255
	Eisbrecher Stettin	0.232143

## Sheet: Figure_11,12
	Rollout	komplexity	Increase	number of participating projects
	Marseille		0.601626	17
	Altona	54	0.795666	15
	Bergedorf	54	0.269231	12
	Eimsbüttel	54	-0.142857	12
	Hamburg-Mitte	49	0.362745	21
	Hamburg Harburg	24	0.0901288	6
	Wandsbek	47	0.383838	16
	Cap San Diego	36	0.397129	15
	Halunder Jet	42	0.366337	14
	Rickmer Rickmers	29	0.216931	17
	Schaarhörn	34	0.425287	12
	Elbe 3	101	0.637255	22
	Eisbrecher Stettin	72	0.232143	22
		0.343317
		number of participating projects	Increase
		17	0.601626
		15	0.795666
		12	0.269231
		12	-0.142857
		21	0.362745
		6	0.0901288
		16	0.383838
		15	0.397129
		14	0.366337
		17	0.216931
		12	0.425287
		22	0.637255
		22	0.232143
		0.401566

## Sheet: Figure_13
	scheduled time	execution time	difference
	2015-03-07 22:35:00	2015-03-07 22:31:00	00:04:00
	2015-03-08 06:15:00	2015-03-08 04:12:00	02:03:00
	2015-03-08 08:35:00	2015-03-08 07:58:00	00:37:00
	2015-03-08 10:50:00	2015-03-08 10:21:00	00:29:00
	2015-03-08 15:35:00	2015-03-08 16:36:00	01:01:00
	2015-03-08 16:30:00	2015-03-08 17:07:00	00:37:00
	2015-03-08 18:20:00	2015-03-08 17:01:00	01:19:00
	2015-03-09 01:35:00	2015-03-09 01:22:00	00:13:00
	2015-03-09 13:00:00	2015-03-09 13:00:00	00:00:00

## Sheet: Sigma
	1.04065
	1.12195
	0.926829
	0.910569
	0.804954
	0.95356
	1.17647
	1.06502
	1
	1.04396
	1.02198
	0.934066
	1.24917
	1.03654
	0.943522
	0.770764
	0.921569
	1
	0.980392
	1.09804
	0.978541
	0.995708
	0.772532
	1.25322
	1.17172
	0.929293
	1.25253
	0.646465
	0.995215
	1.09091
	0.899522
	1.01435
	1.0099
	0.851485
	0.891089
	1.24752
	1.07937
	1.20635
	0.888889
	0.825397
	0.758621
	0.873563
	0.942529
	1.42529
	1.52941
	0.529412
	0.823529
	1.11765
	1.19643
	1
	0.803571
	1
Standardabweichung	0.179475

## Sheet: info rollout
Release	Name of release	Rollout	CW	complexity	number of projects
12.6	Marseille	2013-02-17	7		17
13.1	Altona	2013-04-21	16	54	15
13.2	Bergedorf	2013-06-16	24	54	12
13.3	Eimsbüttel	2013-08-11	32	54	12
13.4	Hamburg-Mitte	2013-09-29	39	49	21
13.5	Hamburg Harburg	2013-12-01	48	24	6
13.6	Wandsbek	2014-03-09	10	47	16
14.1	Cap San Diego	2014-05-11	19	36	15
14.2	Halunder Jet	2014-07-06	27	42	14
14.3	Rickmer Rickmers	2014-08-24	34	29	17
14.4	Schaarhörn	2014-10-12	41	34	12
14.5	Elbe 3	2014-12-07	49	101	22
14.6	Eisbrecher Stettin	2015-03-08	10	72	22
